# Supplementary material
Source: Springer Nature journal article supplement (https://www.springermedizin.de/resource/supplementary/12936_2008_763_MOESM1_ESM.pdf/9548468)

Facilities with data from 2001-2007

- In-patient data
- Out-patient data

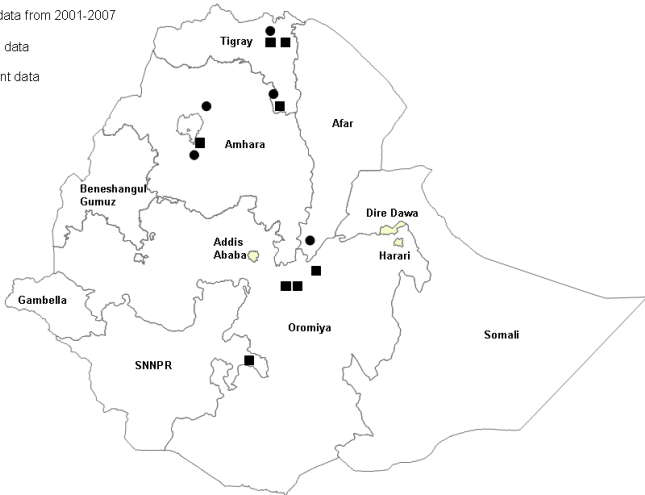

Supplement: MOESM1 [file 9548468]
